# Supplementary material for: Optimization of isotropic MoS2/PES membranes for efficient treatment of industrial oily wastewater
Source: Royal Society of Chemistry journal article supplement (doi:10.1039/d4ra01052c), 2024-01-01
Supplement: d4ra01052c1.pdf [file d4ra01052c1.pdf]

## Optimization of Isotropic MoS<sub>2</sub>/PES Membrane for Efficient Treatment of Industrial Oily Wastewater

Oscar Kayanja<sup>1</sup>, Mohsen A. Hassan<sup>1</sup>, Ahmed Hassanin<sup>1,2</sup>, Hidenori Ohashi<sup>3</sup>,  
Ahmed S. G. Khalil<sup>4,5\*</sup>

<sup>1</sup> Materials Science and Engineering Department, Egypt-Japan University of Science and Technology (E-JUST) 179 New Borg El-Arab City, Alexandria, Egypt.

<sup>2</sup> Department of Textile Engineering, Faculty of Engineering, Alexandria University, Alexandria 21544, Egypt.

<sup>3</sup> Faculty of Engineering, Tokyo University of Agriculture and Technology (TUAT) 2-24-16, Naka-cho, Koganei, Tokyo 184-8588, Japan.

<sup>4</sup> Institute of Basic and Applied Sciences, Egypt-Japan University of Science and Technology (E-JUST) 179 New Borg El-Arab City, Alexandria, Egypt.

<sup>5</sup> Environmental and Smart Technology Group, Faculty of Science, Fayoum University, 63514 Fayoum, Egypt.

\*Corresponding author: Prof. Ahmed S. G. Khalil ([asg05@fayoum.edu.eg](mailto:asg05@fayoum.edu.eg))

### Supporting Information

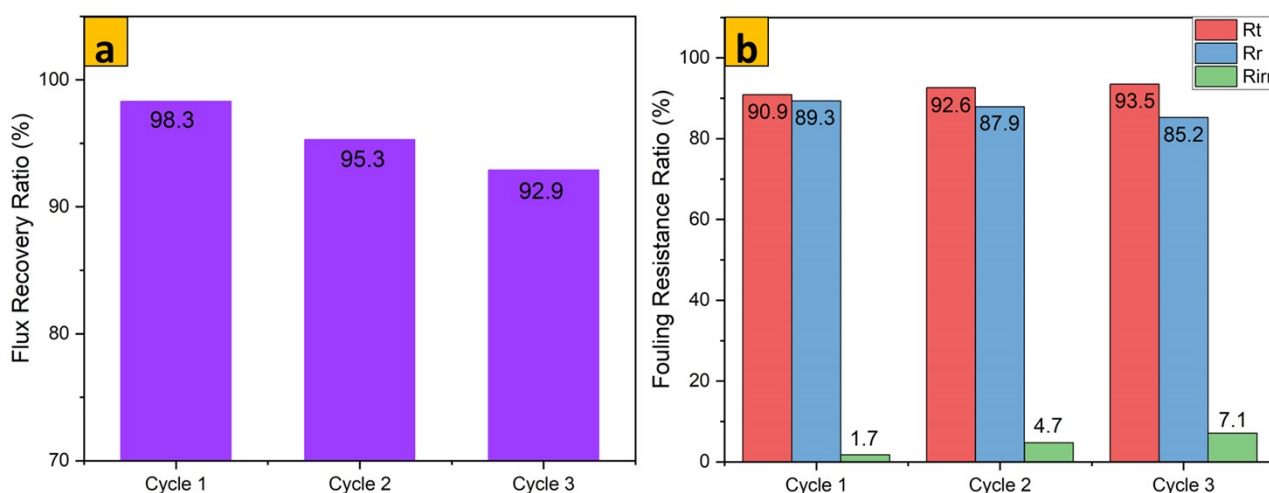

Fig. SI1 (a) FRR, and (b) Flux resistance ratio of M0 for 100 mg/L

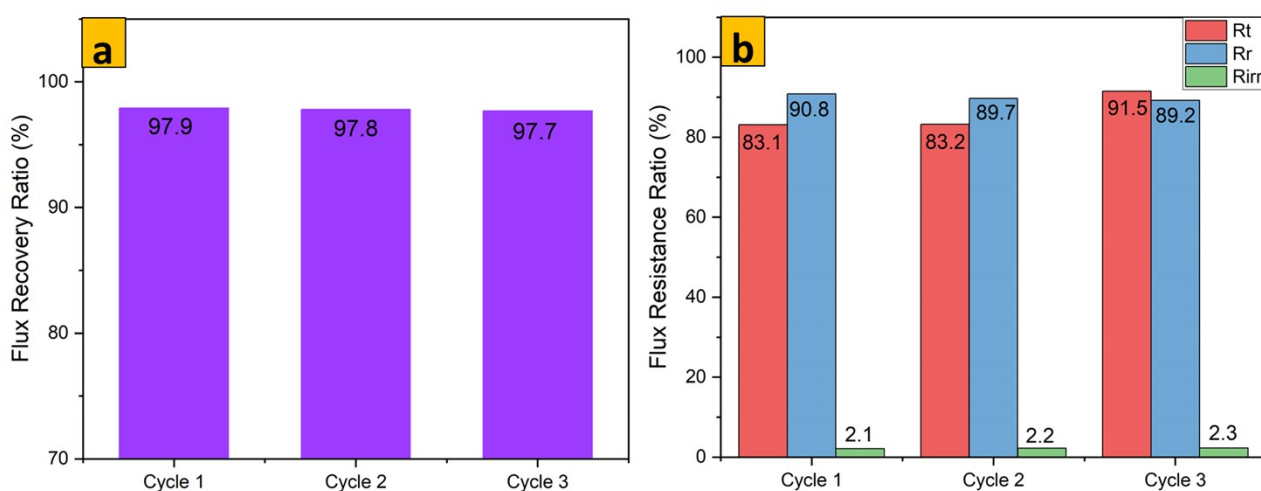

Fig. SI2 (a) FRR, and (b) Flux resistance ratio of M1 for 100 mg/L

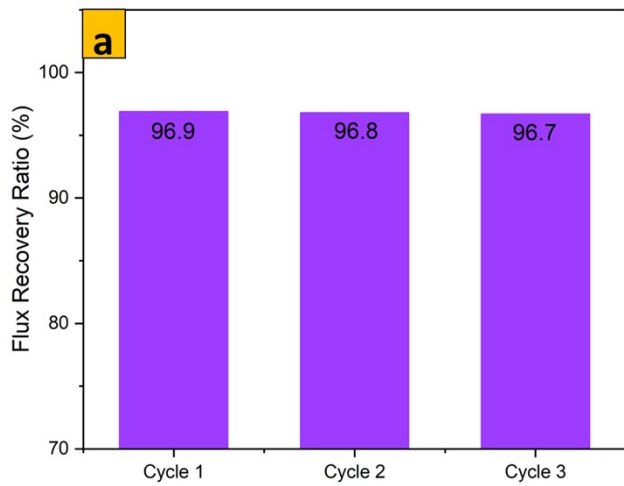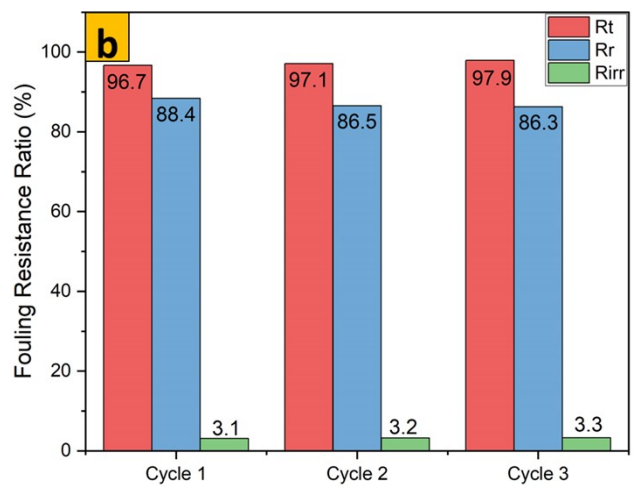

**Fig. SI3 (a) FRR, and (b) Flux resistance ratio of M2 for 100 mg/L**

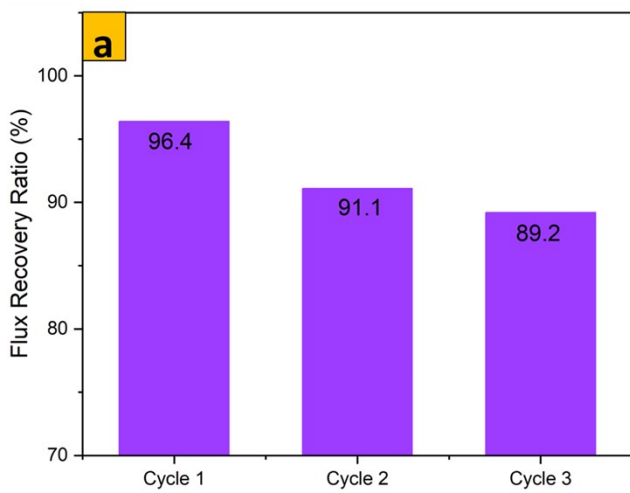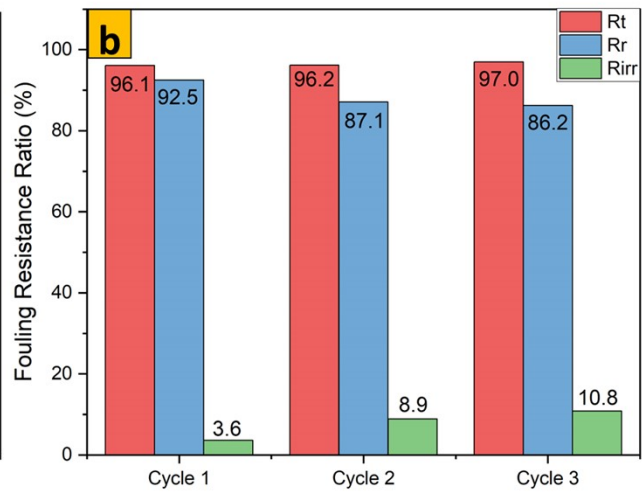

**Fig. SI4 (a) FRR, and (b) Flux resistance ratio of M0 for 10,000 mg/L**

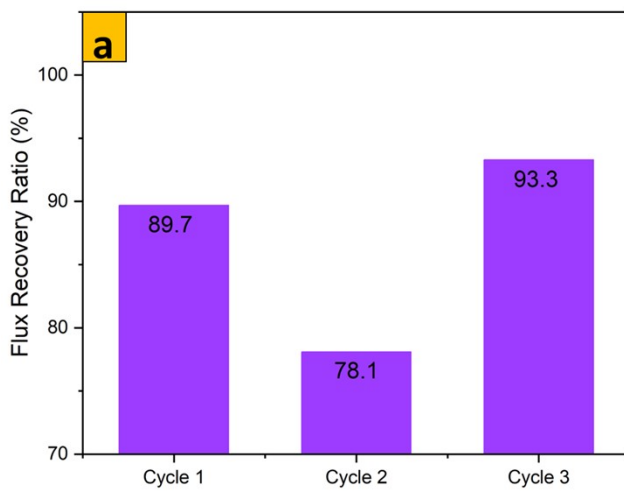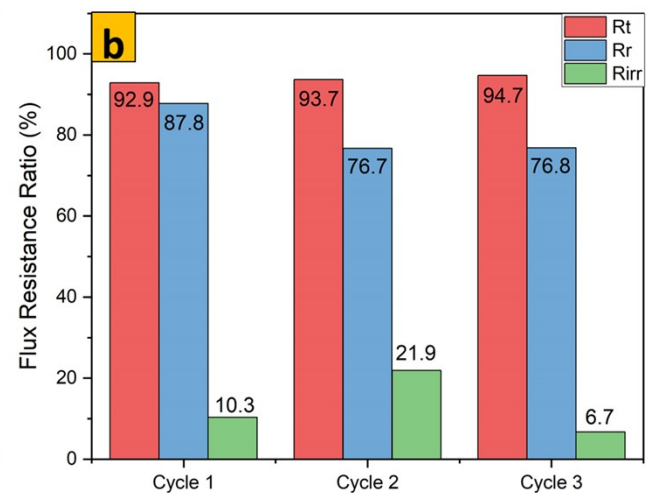

**Fig. SI5 (a) FRR, and (b) Flux resistance ratio of M1 for 10,000 mg/L**

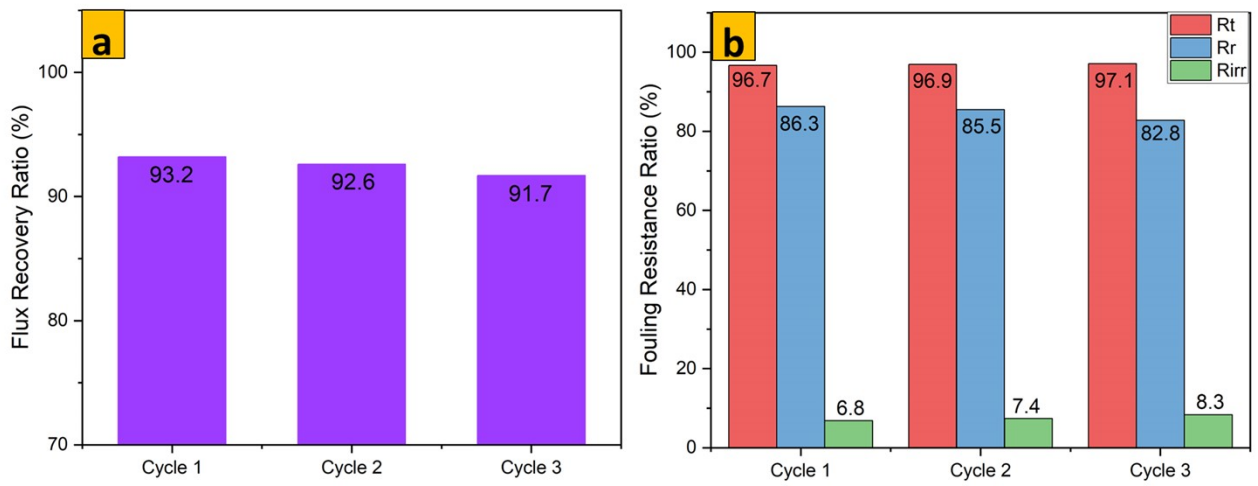

**Fig. S16 (a) FRR, and (b) Flux resistance ratio of M2 for 10,000 mg/L**
